# Supplementary material for: A triple-mode strategy combining low-temperature photothermal, photodynamic, and chemodynamic therapies for treating infectious skin wounds
Source: Royal Society of Chemistry journal article supplement (doi:10.1039/d4bm00859f), 2024-01-01
Supplement: d4bm00859f1.pdf [file d4bm00859f1.pdf]

1 ***Supporting Information***

2 **A triple-mode strategy combining low-temperature**  
3 **photothermal, photodynamic, and chemodynamic**  
4 **therapies for treating infectious skin wounds**

5 Ruichen Ma<sup>1#</sup>, Shaopeng Liu<sup>1#</sup>, Genhua Liu<sup>1</sup>, Peng Liu<sup>1, 2\*</sup>, Kaiyong Cai<sup>1, 2\*</sup>

6 <sup>1</sup>Key Laboratory of Biorheological Science and Technology of Ministry of Education,  
7 College of Bioengineering, Chongqing University, Chongqing 400044, China

8 <sup>2</sup>Chongqing Key Laboratory of Soft-Matter Material Chemistry and Function  
9 Manufacturing, Chongqing 400044 China

10 #These authors contributed equally.

11 \*Corresponding author: Fax: +86-23-65102877; Tel: +86-23-65102507

12 E-mail: liupeng79@cqu.edu.cn; [kaiyong\\_cai@cqu.edu.cn](mailto:kaiyong_cai@cqu.edu.cn)

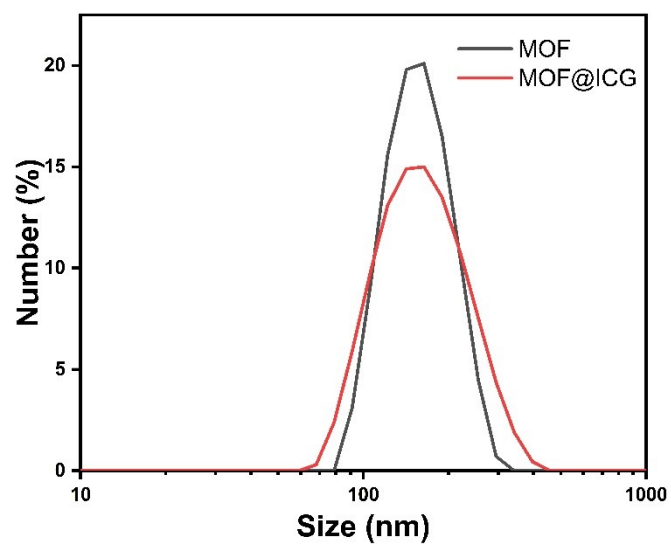

1

2

**Figure S1.** DLS of MOF and MOF@ICG.

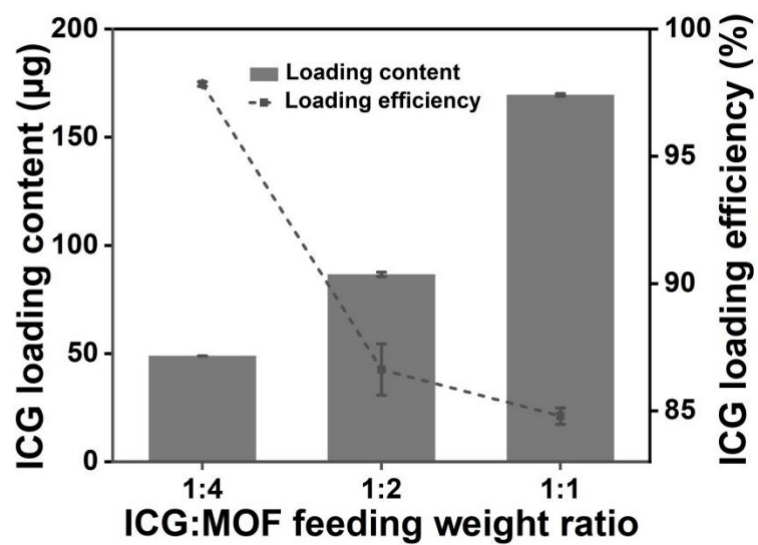

1

2 **Figure S2.** ICG loading content and efficiency of MOF NPs at different ICG: MOF  
3 feeding weight ratio (0.2 mg of MOF).

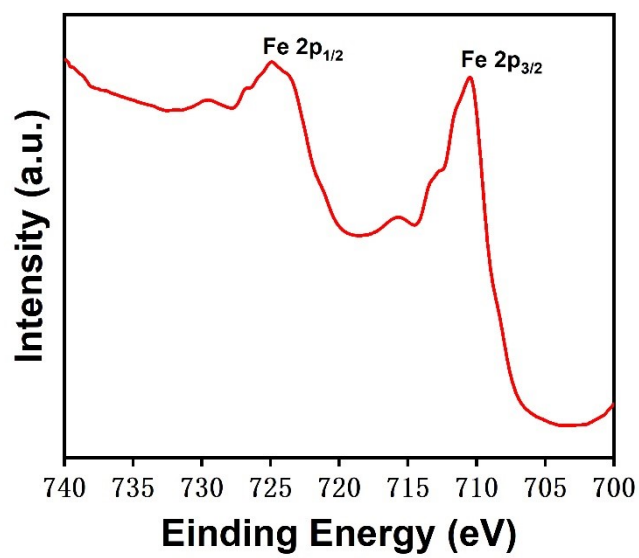

1  
2

**Figure S3.** The XPS spectrum of Fe<sub>2p</sub> from MOF@ICG.

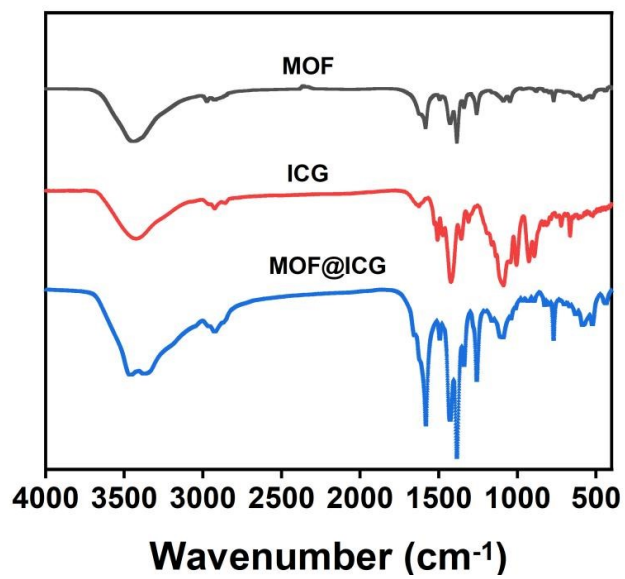

1

2

**Figure S4.** FT-IR spectra of MOF, ICG, and MOF@ICG.

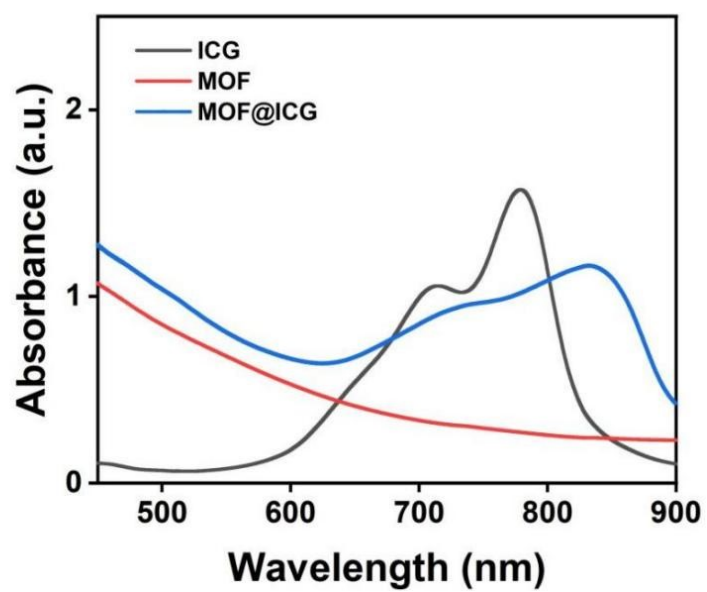

1

2

**Figure S5.** UV-vis spectra of ICG, MOF, and MOF@ICG.

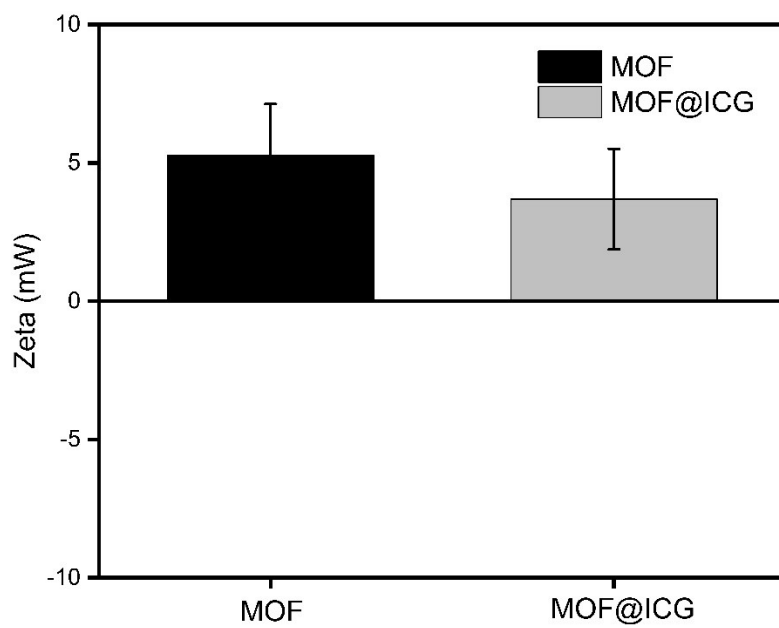

1  
2

**Figure S6.** Zeta potential of MOF and MOF@ICG.

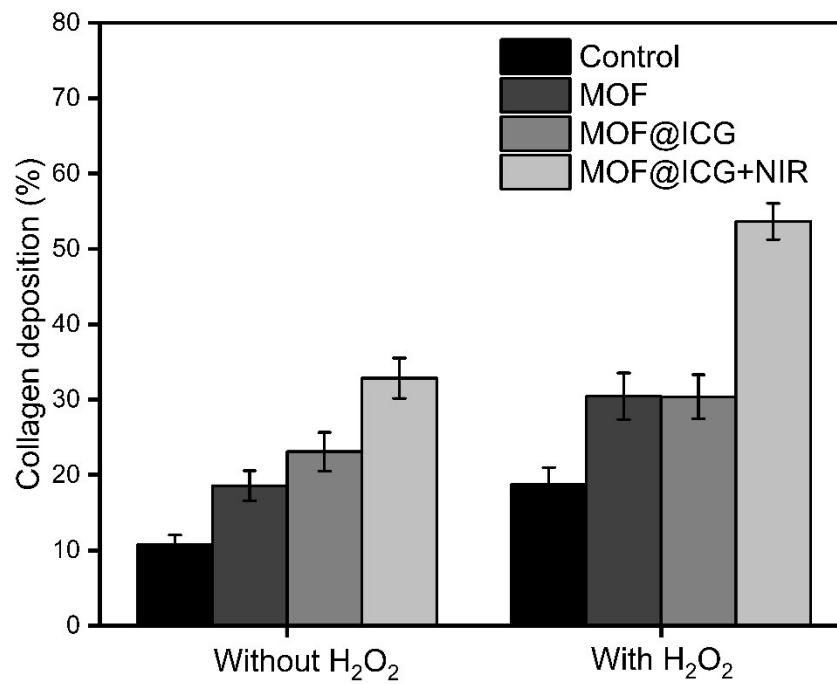

1  
2  
3  
4

**Figure S7.** Quantitative results of collagen deposition in skin tissues of different groups.



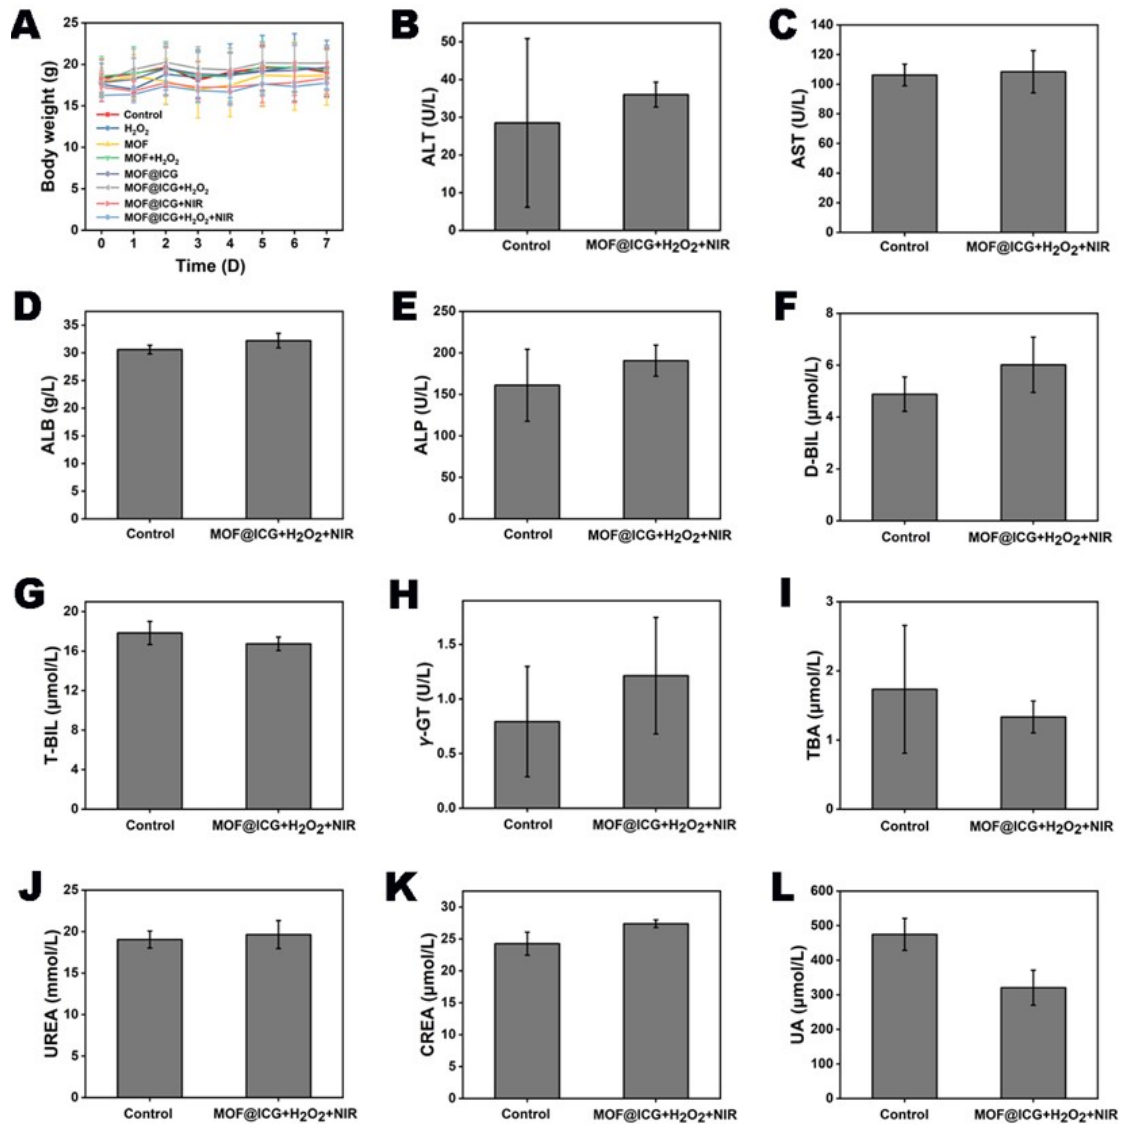

1  
 2 **Figure S8.** (A) Changes of body weight of the mice with different treatments. (B-L) Liver and  
 3 kidney function test of the mice after different treatments: ALT, AST, ALB, ALP, D-BIL, T-BIL,  
 4  $\gamma$ -GT, TBA, UREA, CREA and UA.

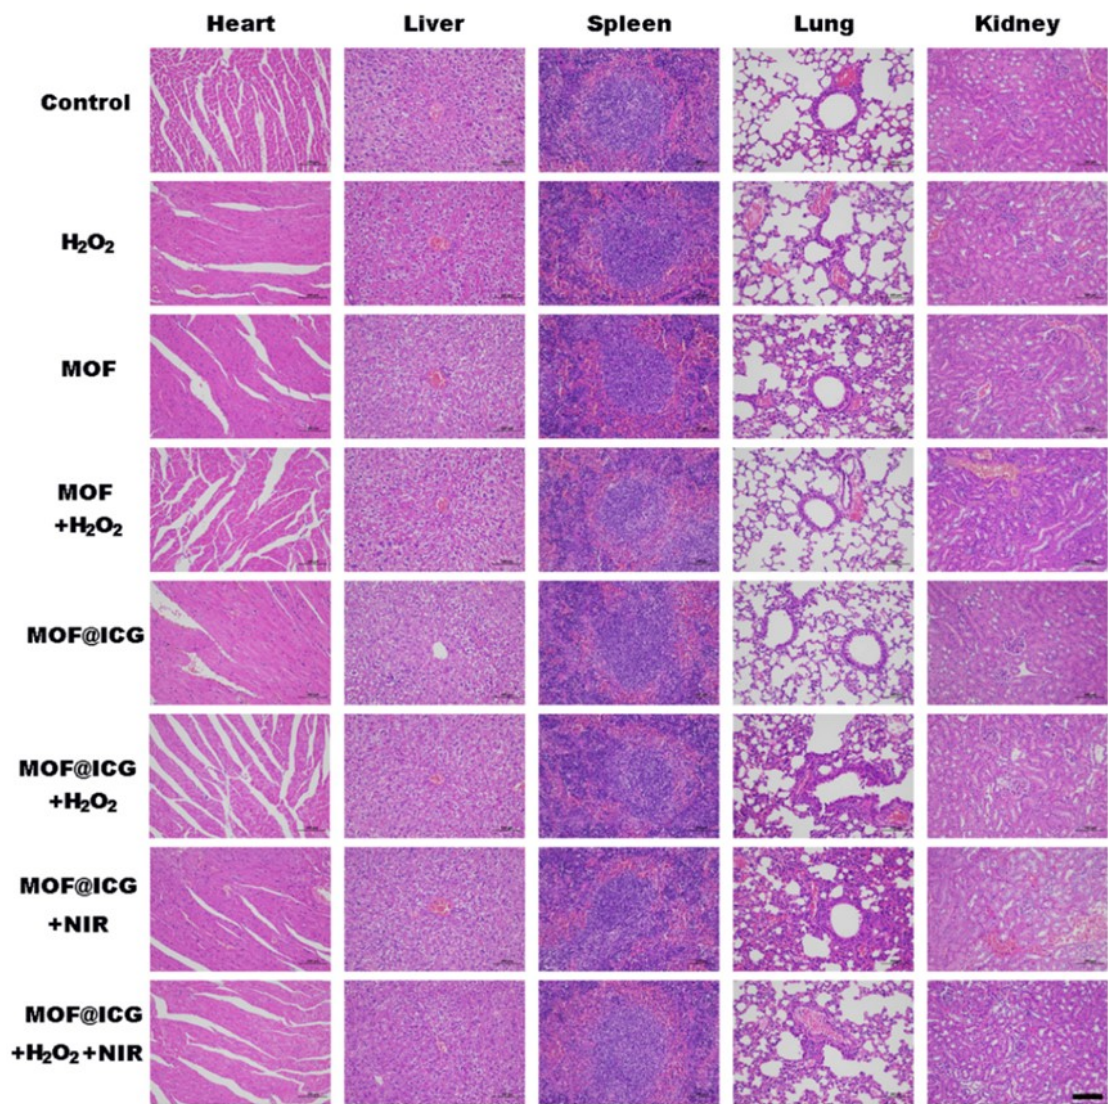

1

2 **Figure S9.** H&E staining images of heart, liver, spleen, lung, and kidney with different treatments

3

after 7 days. (Scale bar: 100  $\mu$ m)
